# Supplementary figures and images for: Lifetime Risks, Life Expectancy, and Health Care Expenditures for Rheumatoid Arthritis: A Nationwide Cohort Followed Up From 2003 to 2016
Source: PubMed Central journal article supplement — Arthritis Rheumatol. 2021 Mar 2;73(5):750–8. doi: 10.1002/art.41597 (PMC8247851; doi:10.1002/art.41597), 2021-03-02

## Supplementary Figure

### Female

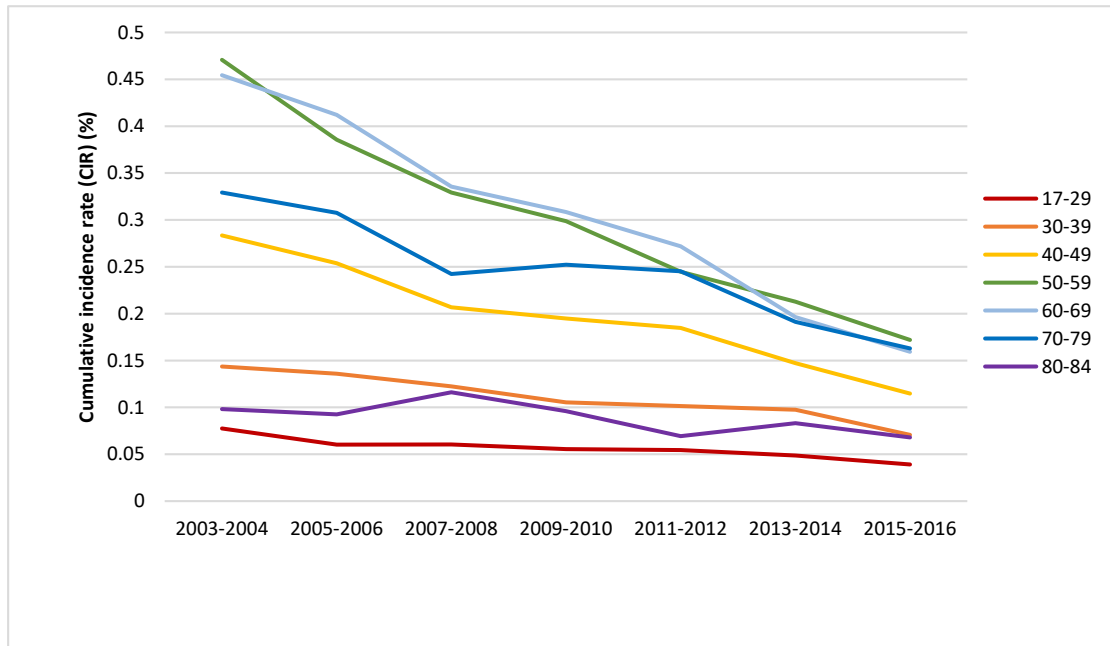

### Male

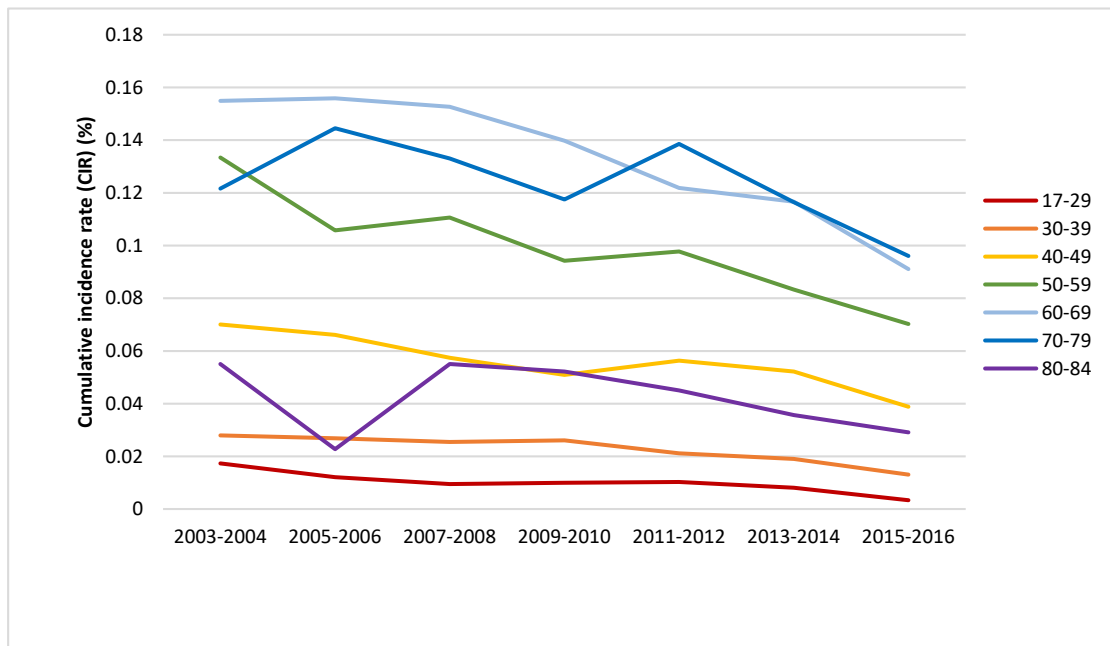

Supplement: ART-73-750-s001.pdf [file ART-73-750-s001.pdf]
